# Supplementary material for: Effect of Benzothiadiazole on the Metabolome of Tomato Plants Infected by Citrus Exocortis Viroid
Source: PubMed Central journal article supplement (PMC6563216; doi:10.3390/v11050437), 2019-05-14
Supplement: viruses-11-00437-s001.pdf [file viruses-11-00437-s001.pdf]

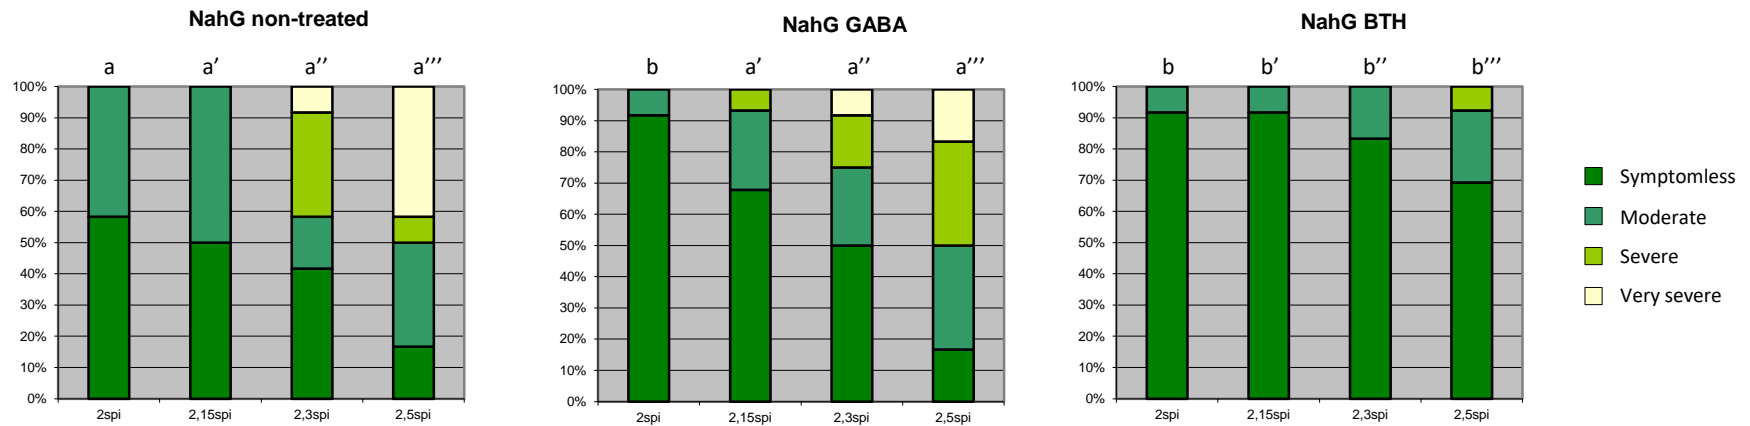

**Figure S1. Disease severity of CEVd-infected NahG tomato plants treated with BTH or GABA with respect to the corresponding non-treated plants.** Symptomatology was scored at 2, 2.15, 2.3 and 2.5 weeks post-inoculation (wpi) using the following scale: symptomless, moderate, severe, and very severe. Data of a representative experiment are shown. A Kruskal-Wallis analysis was performed and different letters indicate significant differences ( $p < 0.05$ ) between the non-treated and chemical treated NahG tomato plants.
